# Supplementary material
Source: Springer Nature journal article supplement (https://www.springermedizin.de/resource/supplementary/13063_2009_373_MOESM4_ESM.pdf/9618092)
Supplement: MOESM4 [file 9618092]

## **ALARM International Program**

### **Indicators for implementation**

Identification of opinion leaders  
Training in best practices  
Review of maternal deaths  
Implementation of recommendations  
Educational outreach visits by external facilitators

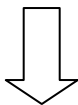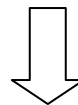

### **Indicators of resource availability**

Basic services (water, electricity ...)  
Essential laboratory tests  
Essential EmOC\* equipment  
Intrapartum care services  
Specialized medical services  
Anaesthesia-resuscitation  
Human resources  
Care protocols

### **Indicators of quality of care**

Essential obstetrical interventions  
Standard obstetric care according to  
the criterion-based clinical audit  
Satisfaction of health personnel

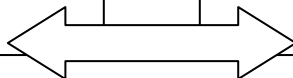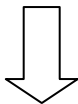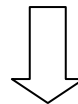

### **Maternal and perinatal health outcomes**

Maternal mortality  
Maternal morbidity and case fatality  
Perinatal mortality
